# Supplementary material for: Validation of AVHRR Land Surface Temperature with MODIS and In Situ LST—A TIMELINE Thematic Processor
Source: MDPI journal article supplement (doi:10.3390/rs13173473), 2021-09-01
Supplement: s1 [file s1]

---

# Supplementary Materials: Validation of AVHRR Land Surface Temperature with MODIS and in situ LST—A TIMELINE Thematic Processor *Remote Sensing* 2021, X, Article No.

Philipp Reiners 1,\* , Sarah Asam 1, Corinne Frey 2, Stefanie Holzwarth 1, Martin Bachmann 1, Jose Sobrino 3, Frank M. Göttsche 4, Jörg Bendix 5 and Claudia Kuenzer 1,6

## Supplementary Material

**Table S1.** CCI land cover classes and their corresponding emissivity classes.

| CCI Class | CCI Description                                                                    | Emissivity class | Emissivity description                    |
|-----------|------------------------------------------------------------------------------------|------------------|-------------------------------------------|
| 20        | Cropland, irrigated or post flooding                                               | 1                | Flooded vegetation, crops and grasslands  |
| 160       | Tree cover, flooded, fresh or brakish water                                        | 2                | Flooded forest and shrublands             |
| 170       | Tree cover, flooded, saline water                                                  |                  |                                           |
| 180       | Shrub or herbaceous cover, flooded fresh/saline/brakish water                      |                  |                                           |
| 10        | Cropland, rainfed                                                                  | 3                | Croplands and grasslands                  |
| 11        | Cropland, rainfed, herbaceous cover                                                |                  |                                           |
| 12        | Cropland, rainfed, tree or shrub cover                                             |                  |                                           |
| 30        | Mosaic cropland (>50%) / natural vegetation (tree, shrub, herbaceous cover) (<50%) |                  |                                           |
| 130       | Grassland                                                                          |                  |                                           |
| 150       | Sparse vegetation (tree, shrub, herbaceous cover) (<15%)                           |                  |                                           |
| 151       | Sparse tree (<15%)                                                                 |                  |                                           |
| 152       | Sparse shrub (<15%)                                                                |                  |                                           |
| 110       | Mosaic herbaceous cover                                                            |                  |                                           |
| 153       | Sparse herbaceous cover (<15%)                                                     |                  |                                           |
| 140       | Lichens and mosses                                                                 | 4                | Shrublands                                |
| 120       | Shrubland                                                                          |                  |                                           |
| 121       | Evergreen shrubland                                                                |                  |                                           |
| 122       | Deciduous shrubland                                                                |                  |                                           |
| 40        | Mosaic natural vegetation (tree, shrub, herbaceous cover) (>50%) / cropland (<50%) |                  |                                           |
| 60        | Tree cover, broadleaved, deciduous, closed to open (>15%)                          | 5                | Broadleaved/needleleaved deciduous forest |
| 61        | Tree cover, broadleaved, deciduous, closed (>40%)                                  |                  |                                           |
| 62        | Tree cover, broadleaved, deciduous, open (15-40%)                                  |                  |                                           |
| 80        | Tree cover, needleleaved, deciduous, closed to open (>15%)                         |                  |                                           |
| 90        | Tree cover, mixed leaf type (broadleaved and needleleaved)                         |                  |                                           |
| 82        | Tree cover, needleleaved, deciduous, open (15-40%)                                 | 6                | Broadleaved/needleleaved evergreen forest |
| 50        | Tree cover, broadleaved, evergreen, closed to open (>15%)                          |                  |                                           |
| 70        | Tree cover, needleleaved, evergreen, closed to open (>15%)                         |                  |                                           |
| 71        | Tree cover, needleleaved, evergreen, closed (>40%)                                 |                  |                                           |
| 72        | Tree cover, needleleaved, evergreen, open (15-40%)                                 |                  |                                           |
| 100       | Mosaic tree and shrub (>50%) / herbaceous cover (<50%)                             | 7                | Urban area                                |
| 190       | Urban areas                                                                        |                  |                                           |
| 200       | Bare areas                                                                         |                  |                                           |
| 201       | Consolidated bare areas                                                            |                  |                                           |
| 202       | Unconsolidated bare areas                                                          | 8                | Bare rock                                 |
| 210       | Water bodies                                                                       |                  |                                           |
| 220       | Permanent snow and ice                                                             | 9                | Water                                     |
|           |                                                                                    | 10               | Snow and ice                              |

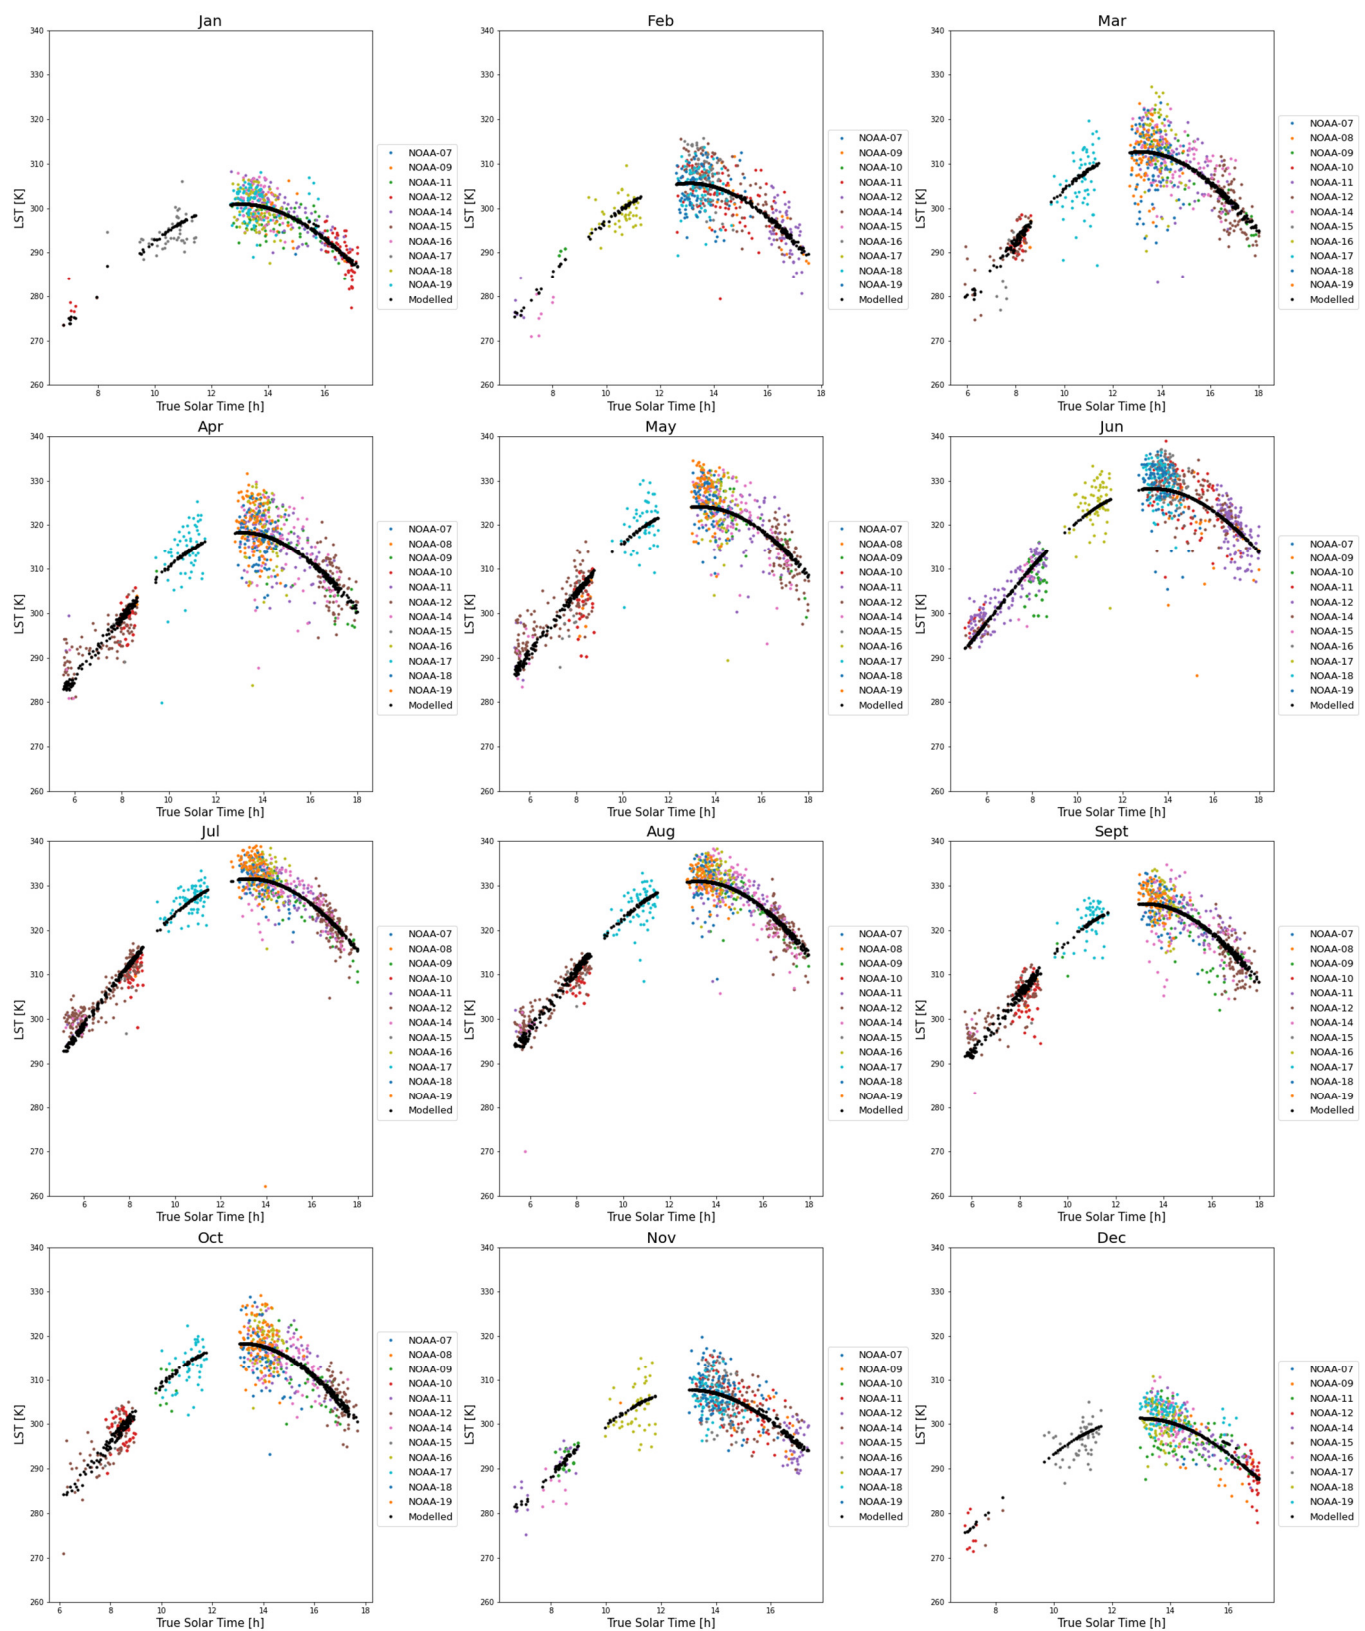

Figure S1. LST at Algeria3 aggregated per month by platform and the resulting DTCs.

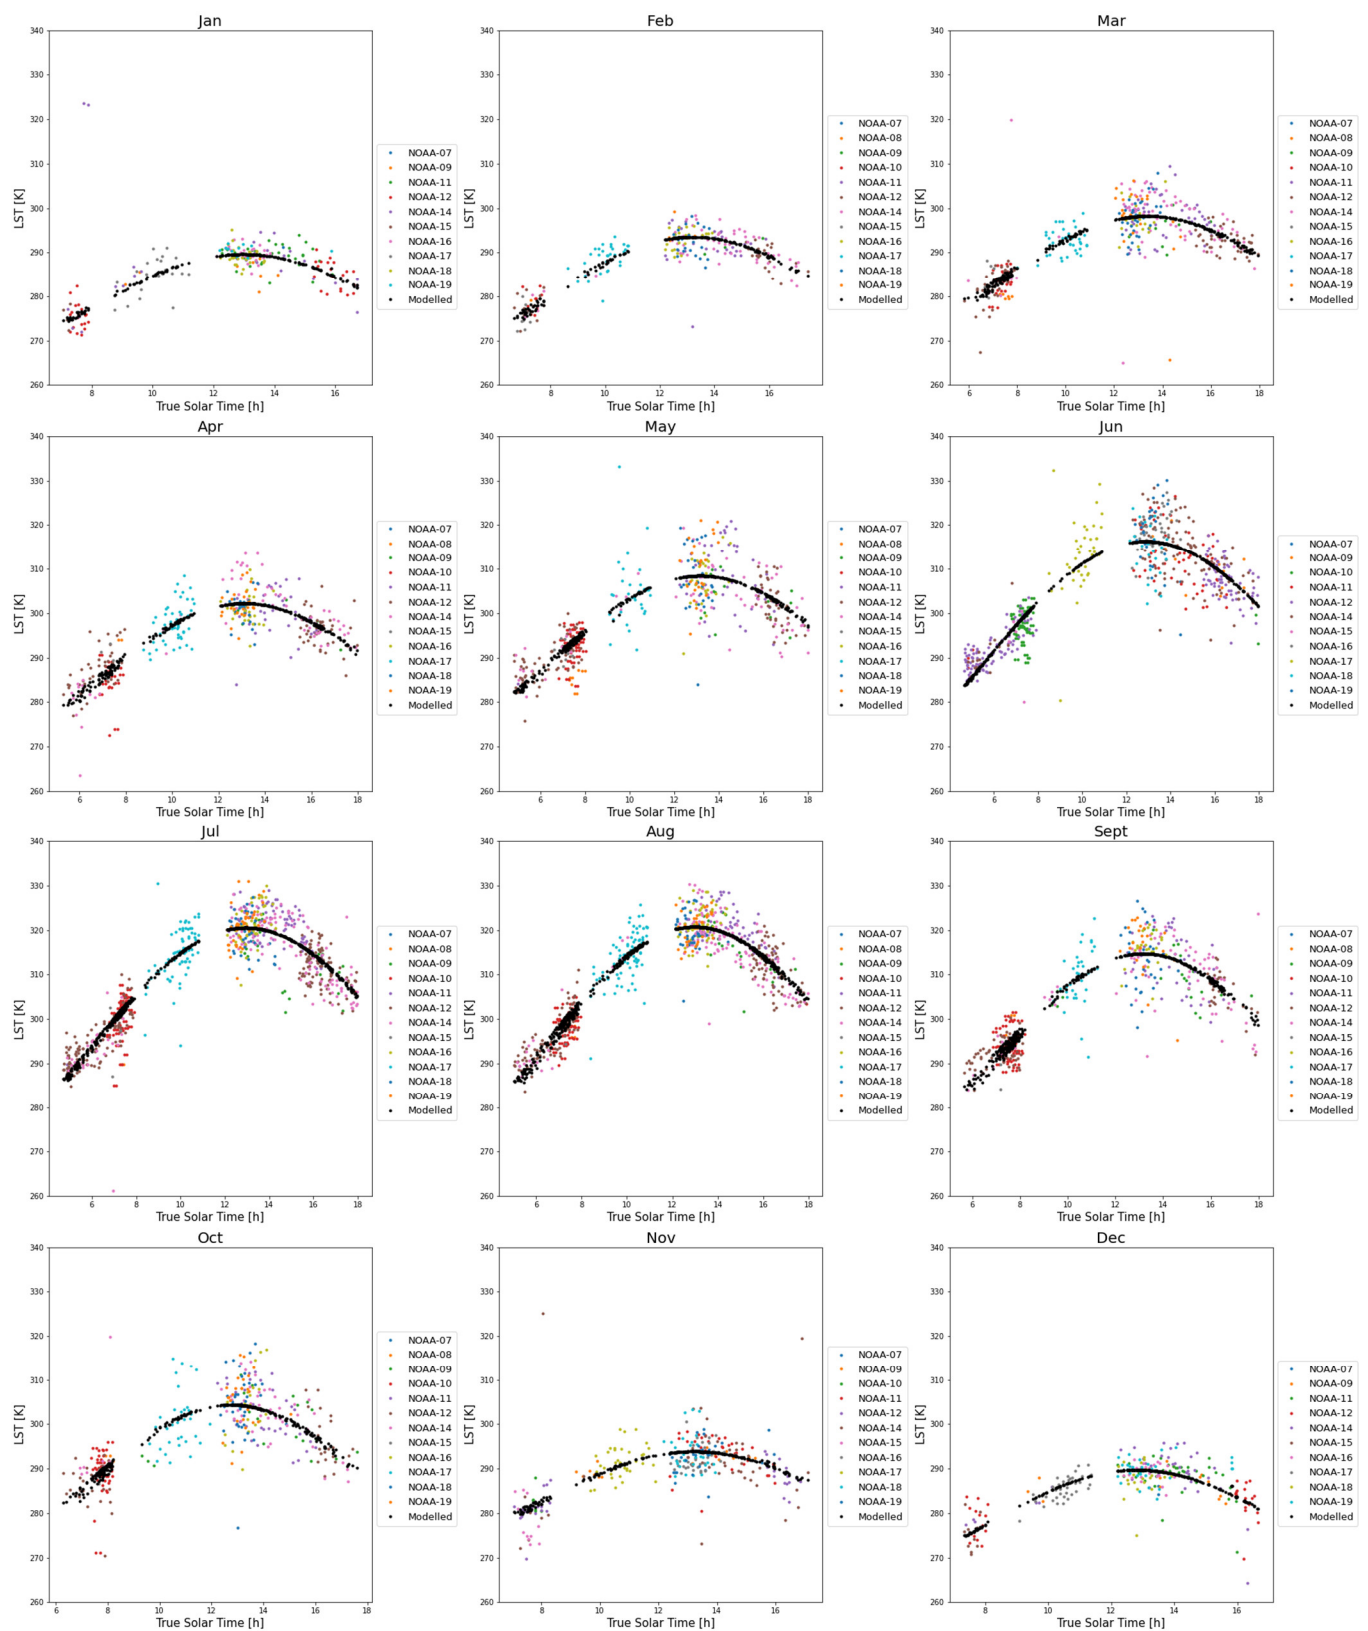

Figure S2. LST at EV aggregated per month by platform and the resulting DTCs.

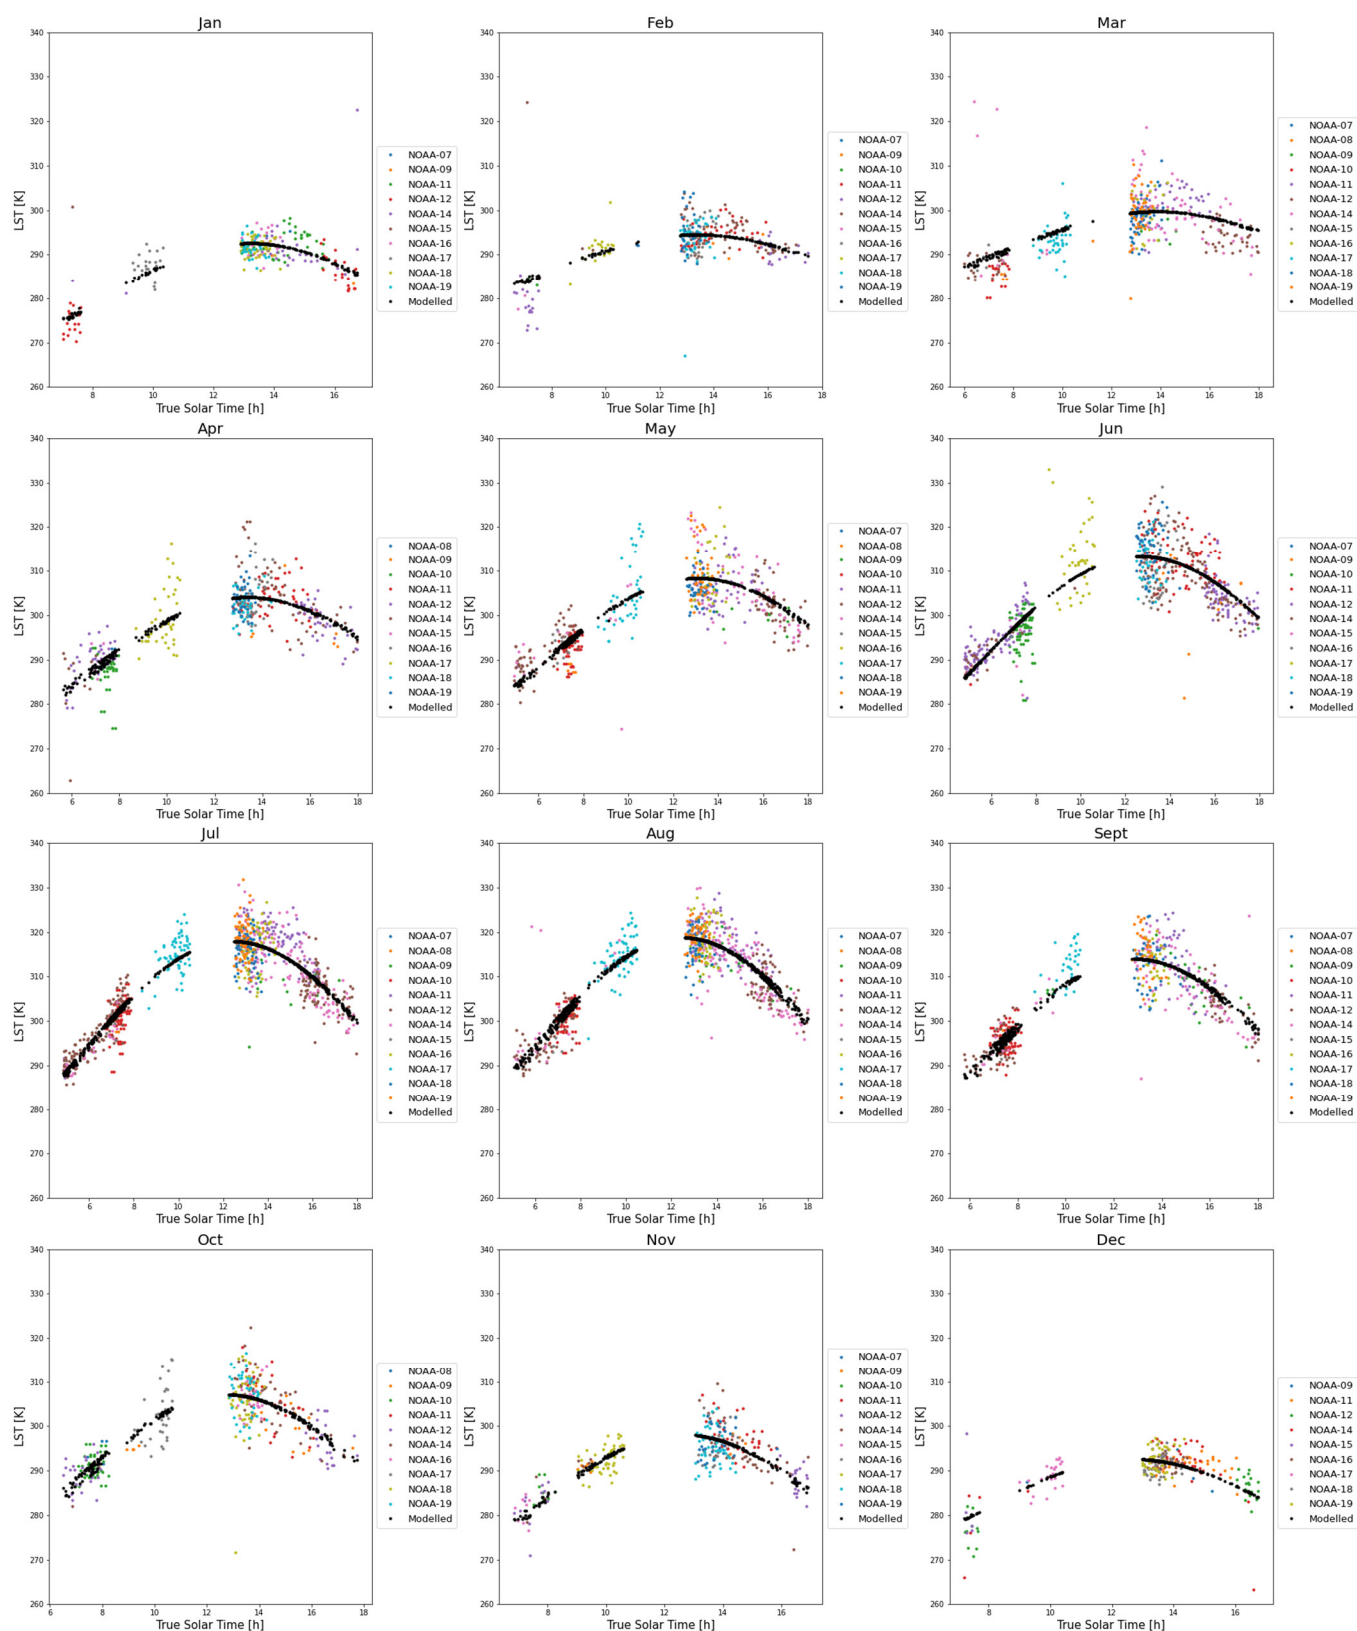

Figure S3. LST at DN aggregated per month by platform and the resulting DTCs.

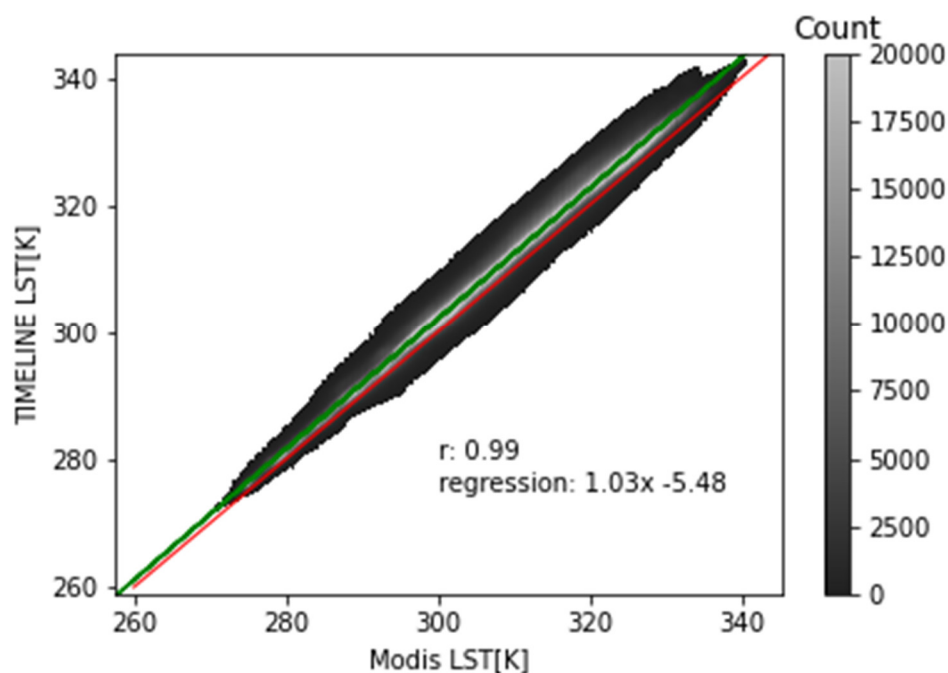

**Figure S4.** TIMELINE against MODIS LST in 2013 with the 1:1 line (red) and regression line (green).

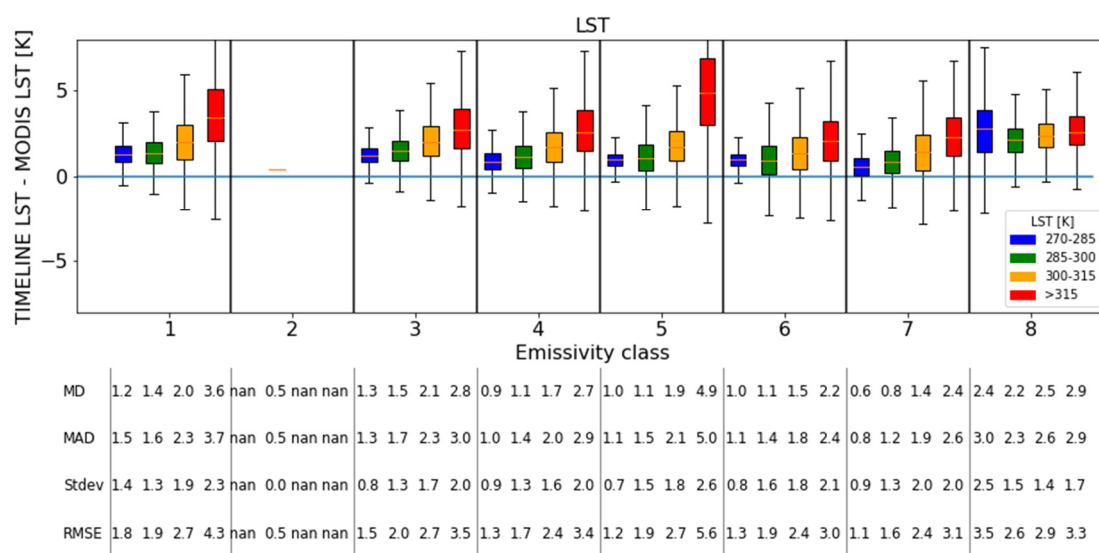

**Figure S5.** Difference between TIMELINE and MODIS LST classified by LST and the emissivity classes by [57]: (1) Flooded vegetation, crops and grasslands. (2) Flooded forest and shrublands. (3) Croplands and grasslands. (4) Shrublands. (5) Broadleaved/ needleleaved deciduous forest. (6) Broadleaved/ needleleaved evergreen forest. (7) Urban area. (8) Bare rock.

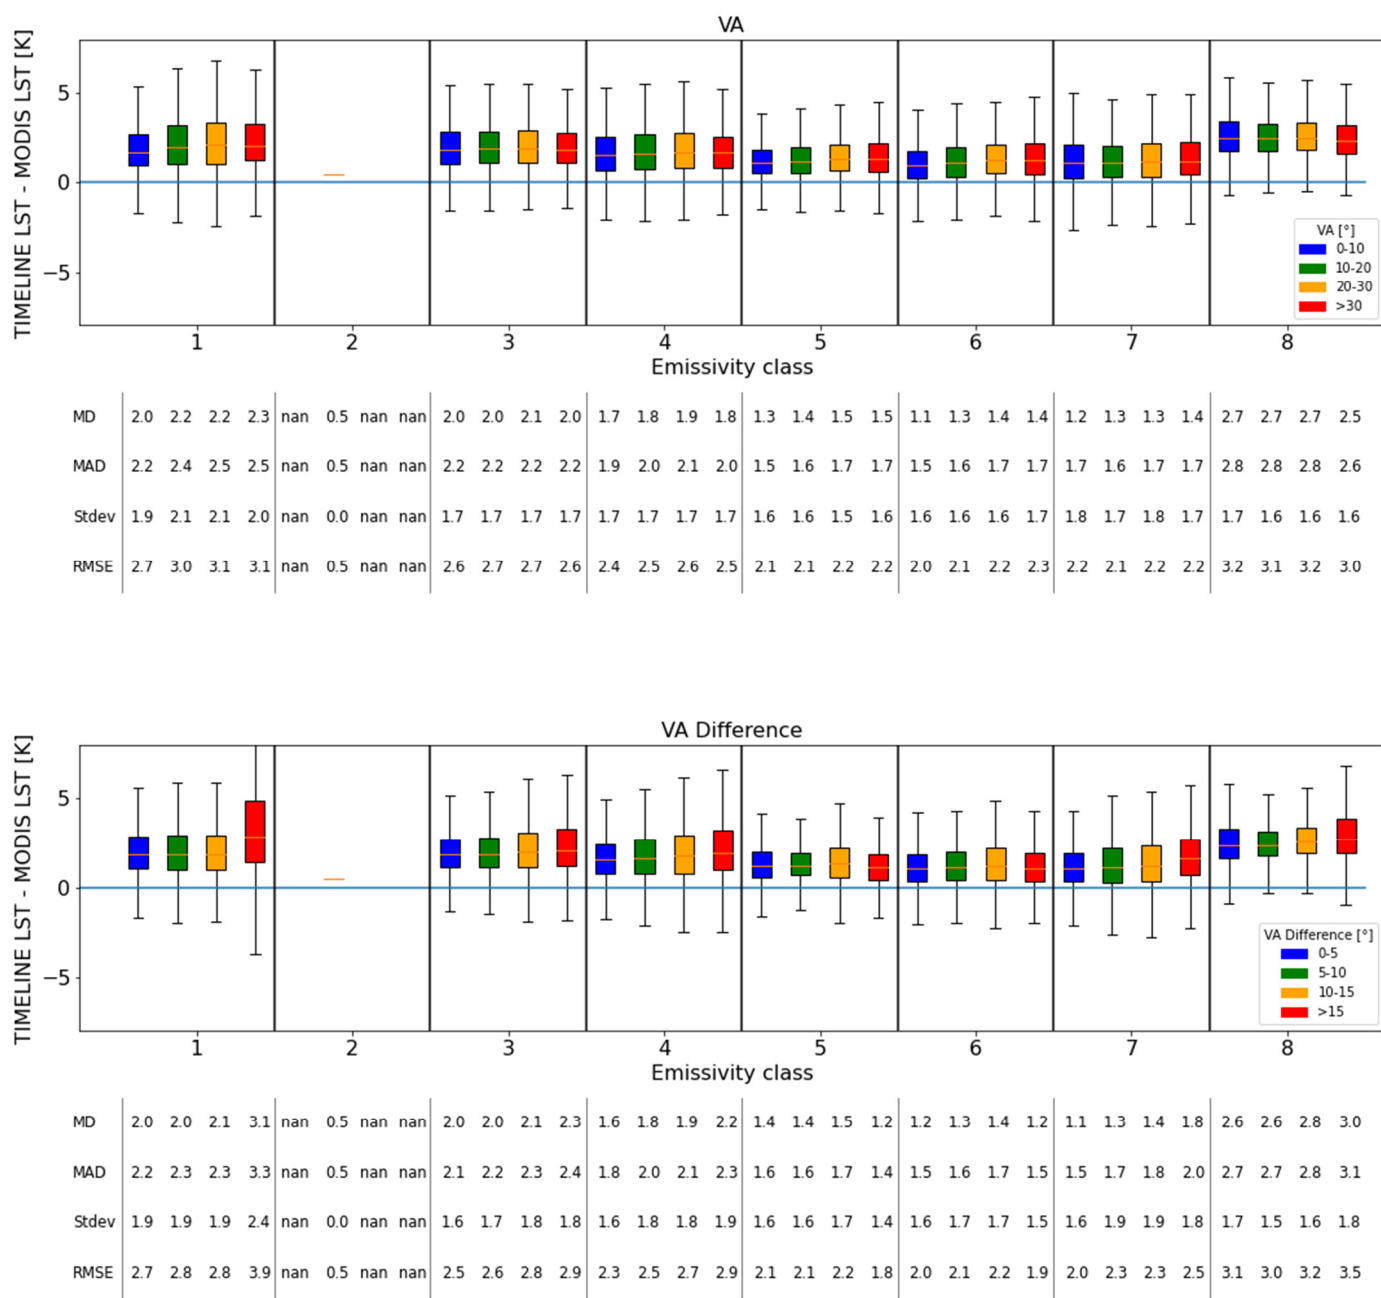

**Figure S6.** Difference between TIMELINE and MODIS LST classified by VA, absolute VA difference between AVHRR and MODIS, and the emissivity classes devised by [57].



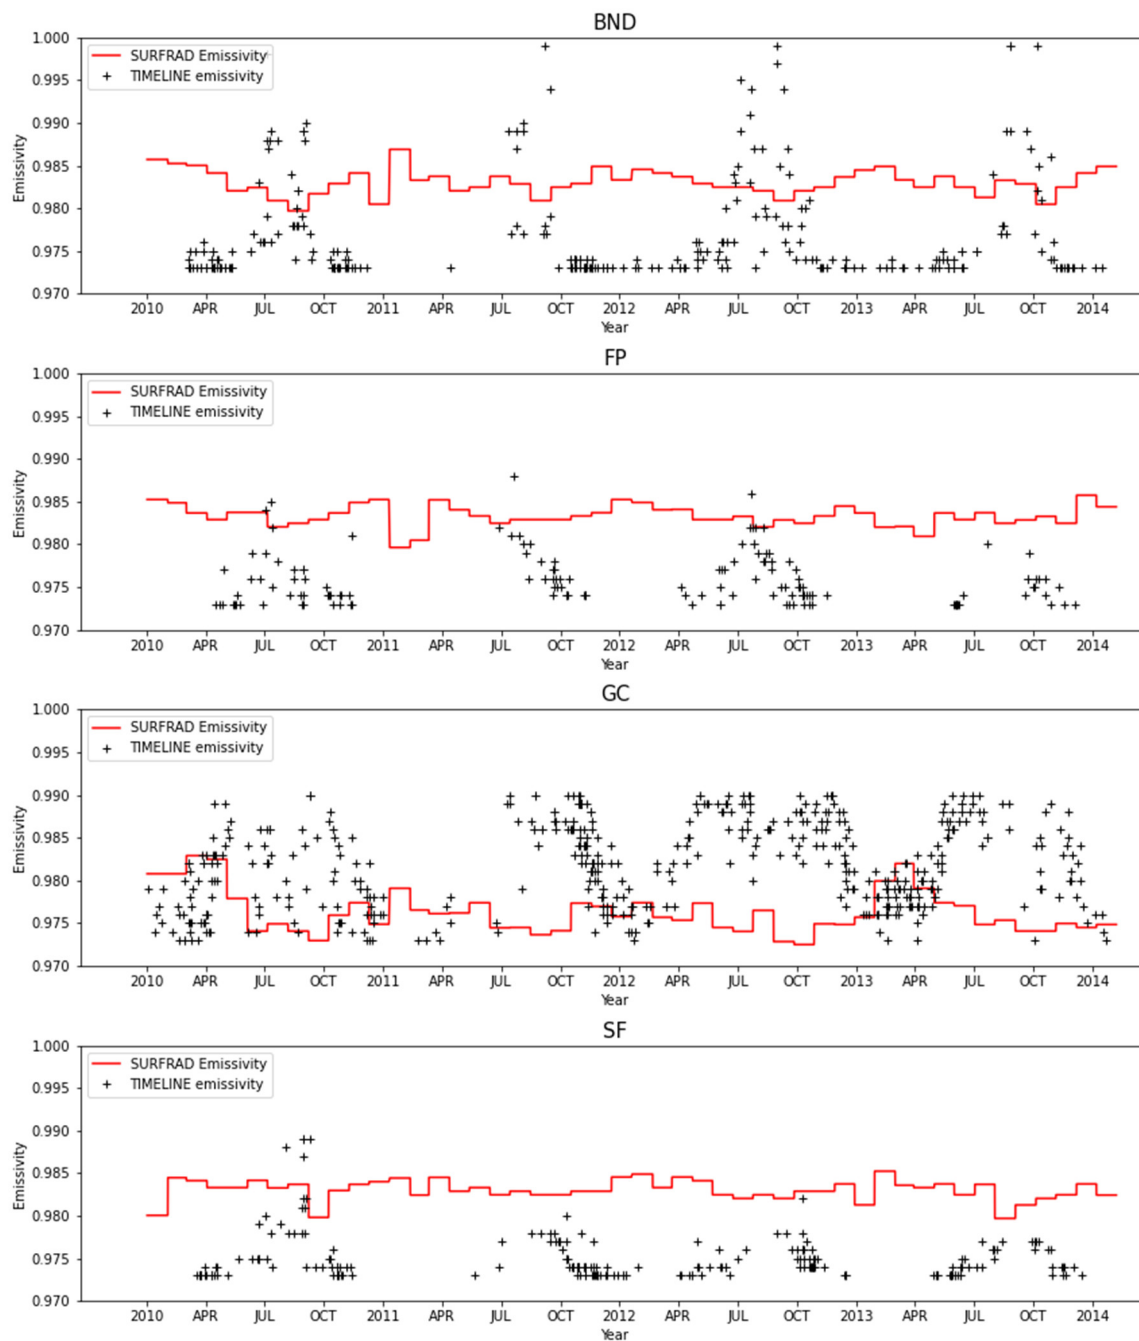

**Figure S7.** SURFRAD emissivity and TIMELINE emissivity at the vegetated sites BND, FP, GC and SF.



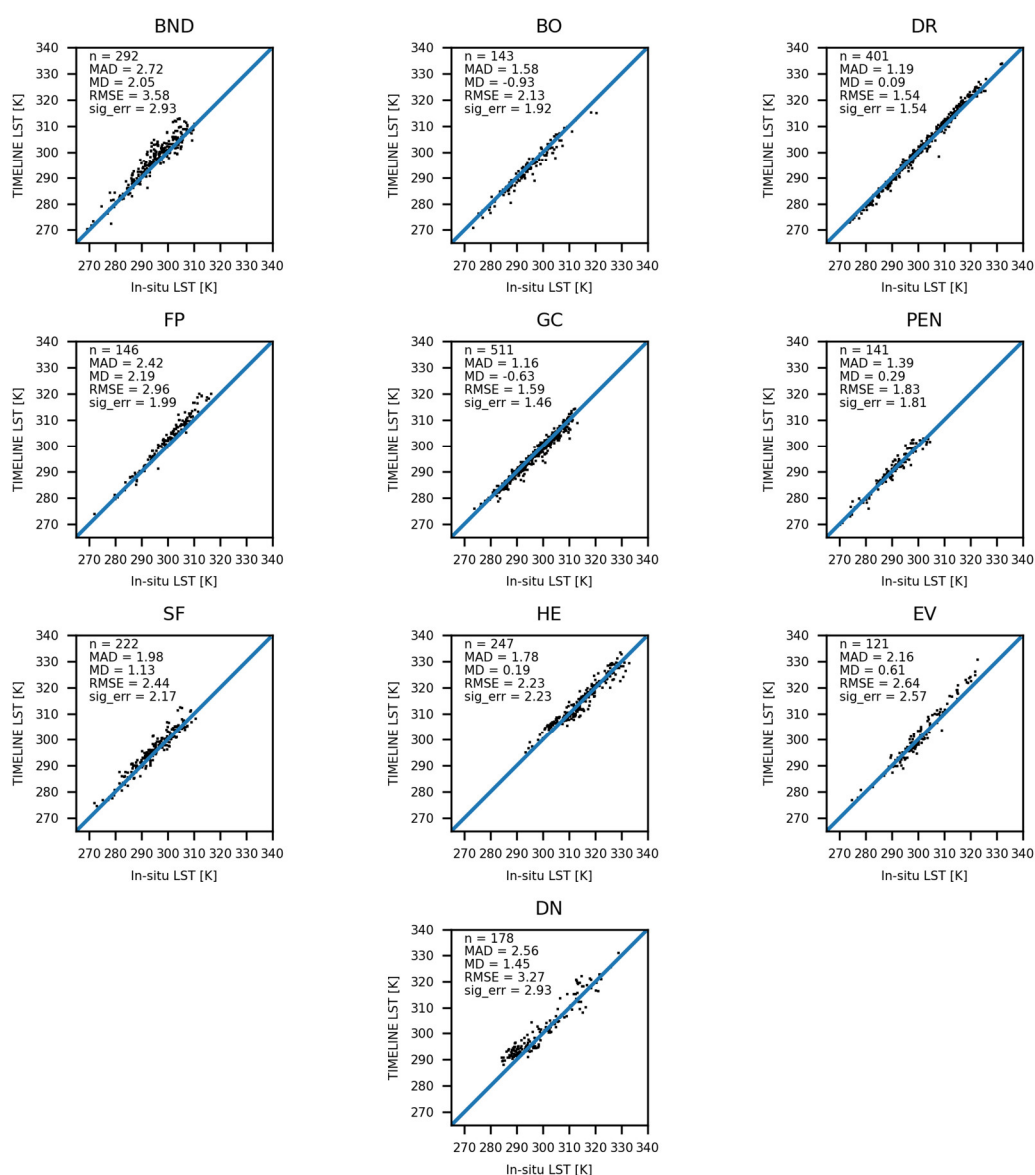

**Figure S8.** TIMELINE LST against in situ LST at all 10 in situ stations (as Figure 4), but this time in situ LST at the SURDRAD stations was estimated with TIMELINE emissivity.
